# Supplementary material
Source: Copernicus journal article supplement (doi:10.5194/egqsj-14-35-1963)
Supplement: Supplementary file 1 [file egqsj-14-35-1963-supplement.zip]

| Tafel II (Zur Arbeit Vinken) |                                 |                          |                                                      |                     |                                                      |                           |                                                      |                      |                                                      |                       |                                                      |                    |                                                      |                        |                                                      |                            |                                                        |                               |                                                                                                       |               |                                                                     |
|------------------------------|---------------------------------|--------------------------|------------------------------------------------------|---------------------|------------------------------------------------------|---------------------------|------------------------------------------------------|----------------------|------------------------------------------------------|-----------------------|------------------------------------------------------|--------------------|------------------------------------------------------|------------------------|------------------------------------------------------|----------------------------|--------------------------------------------------------|-------------------------------|-------------------------------------------------------------------------------------------------------|---------------|---------------------------------------------------------------------|
| Gliederung                   | Stufen<br>(nach Lüttig<br>1959) | Paglia-Mündung<br>Baschi |                                                      | S. Castiglione i.T. |                                                      | Graffignano<br>Attigliano |                                                      | Bassano i.T.<br>Orte |                                                      | Unterlauf<br>der Nera |                                                      | Gallese - Otricoli |                                                      | E Civita<br>Castellana |                                                      | Magliano S.<br>Stimigliano |                                                        | W Poggio Mirteto<br>S Vittore |                                                                                                       | Pte. Sfondato |                                                                     |
| Holo-<br>zän                 | Holozän                         |                          | Erosion<br>Ablagerungen<br>i. d. Flußbaue<br>Erosion |                     | Erosion<br>Ablagerungen<br>i. d. Flußbaue<br>Erosion |                           | Erosion<br>Ablagerungen<br>i. d. Flußbaue<br>Erosion |                      | Erosion<br>Ablagerungen<br>i. d. Flußbaue<br>Erosion |                       | Erosion<br>Ablagerungen<br>i. d. Flußbaue<br>Erosion |                    | Erosion<br>Ablagerungen<br>i. d. Flußbaue<br>Erosion |                        | Erosion<br>Ablagerungen<br>i. d. Flußbaue<br>Erosion |                            | Erosion<br>Ablagerungen<br>i. d. Flußbaue<br>Erosion   |                               | Erosion<br>Ablagerungen<br>i. d. Flußbaue                                                             |               | Erosion<br>Ablagerungen<br>i. d. Flußbaue<br>Erosion                |
| Jung- und Mittel-Pleistozän  | Tiber-<br>Stufe                 |                          | Untere<br>Terrasse<br>15—20 m                        |                     | Untere<br>Terrasse<br>15 m                           |                           |                                                      |                      |                                                      |                       |                                                      |                    | Untere<br>Terrasse<br>5 m                            |                        |                                                      |                            |                                                        |                               |                                                                                                       |               |                                                                     |
|                              |                                 |                          | Erosion                                              |                     | Erosion<br>vulkanische<br>Eruptionen<br>Travertin    |                           | Erosion<br>vulkanische<br>Eruptionen<br>Travertin    |                      | Erosion<br>vulkanische<br>Eruptionen<br>Travertin    |                       | Erosion                                              |                    | Erosion<br>vulkanische<br>Eruptionen                 |                        | vulkanische<br>Eruptionen                            |                            | vulkanische<br>Eruptionen                              |                               | vulkanische<br>Eruptionen                                                                             |               | vulkanische<br>Eruptionen                                           |
|                              | Ombrone-<br>Stufe               |                          | Mittlere<br>Terrasse<br>45—55 m                      |                     | Mittlere<br>Terrasse<br>33—45 m                      |                           | Mittlere<br>Terrasse<br>20 m                         |                      | Mittlere<br>Terrasse<br>11—13 m                      |                       | Mittlere<br>Terrasse<br>10—20 m                      |                    | Mittlere<br>Terrasse<br>8—10 m                       |                        |                                                      |                            |                                                        |                               |                                                                                                       |               |                                                                     |
|                              |                                 |                          | Erosion                                              |                     | Erosion<br>Travertin                                 |                           | Erosion                                              |                      | Erosion                                              |                       | Erosion                                              |                    | Erosion                                              |                        |                                                      |                            | Erosion                                                |                               | Erosion                                                                                               |               | Erosion<br>Travertin                                                |
|                              | Elsa-<br>Stufe                  |                          | Obere<br>Terrasse<br>80—90 m                         |                     | Obere<br>Terrasse<br>70—80 m                         |                           | Obere<br>Terrasse<br>55 m                            |                      | Obere<br>Terrasse<br>40 m                            |                       | Obere<br>Terrasse<br>40—60 m                         |                    | Obere<br>Terrasse<br>30—35 m                         |                        |                                                      |                            | Obere<br>Terrasse<br>27—30 m                           |                               | Obere<br>Terrasse<br>15—17 m                                                                          |               | Obere<br>Terrasse<br>12 m                                           |
|                              |                                 |                          | Erosion                                              |                     | Erosion<br>Travertin                                 |                           | Erosion<br>Travertin                                 |                      | Erosion<br>Travertin                                 |                       | Erosion                                              |                    | Erosion<br>Terra rossa                               |                        | Erosion<br>Travertin                                 |                            | Erosion                                                |                               | Erosion                                                                                               |               | Erosion                                                             |
| Altpleistozän                | Arno-<br>Stufe                  |                          | <i>Schichtlücke?</i>                                 |                     | vorwiegend<br>vulkanogene<br>Ablagerungen            |                           | vulkanogene<br>Ablagerungen                          |                      | <i>Schichtlücke?</i>                                 |                       |                                                      |                    |                                                      |                        | vulkanogene<br>Ablagerungen                          |                            | fluviatile<br>Schotter und<br>vulkanogene<br>Bildungen |                               | fluviatile<br>Schotter                                                                                |               | fluviatile<br>Schotter                                              |
|                              |                                 |                          | limnische<br>Tone und<br>Mergel mit<br>Braunkohle    |                     | limnische<br>Mergel<br>und Tone                      |                           | limnische<br>Mergel<br>und Tone                      |                      | limnische<br>Mergel und<br>Tone mit<br>Braunkohlen   |                       |                                                      |                    | fluviatile<br>Schotter                               |                        | limnische<br>Tone und<br>Mergel,<br>z.T. humos       |                            | Bodenbildung<br>Sande                                  |                               | limnische Tone<br>mit Braunkohle<br>fluviatile<br>Schotter<br>marine Tone<br>und Sande<br>(Calabrian) |               | limnische<br>Mergel, Tone<br>und Sande<br>brackisch?<br>Terra rossa |
|                              |                                 |                          | fluviatile<br>Schotter                               |                     | fluviatile<br>Schotter<br><i>Schichtlücke?</i>       |                           | fluviatile<br>Schotter und<br>Sande                  |                      | fluviatile<br>Schotter                               |                       |                                                      |                    |                                                      |                        | fluviatile<br>Schotter                               |                            | fluviatile<br>Schotter                                 |                               |                                                                                                       |               | fluviatile<br>Schotter                                              |
| Ober-<br>pliozän             | Porrona-<br>Stufe               |                          | marine und<br>ästuarine<br>Kiese und<br>Sande (Asti) |                     | marine<br>Sande (Asti)                               |                           | marine Tone<br>und Sande                             |                      | marine Tone<br>und Sande                             |                       | marine und<br>ästuarine<br>Kiese und<br>Sande (Asti) |                    | marine Tone<br>und Sande                             |                        | marine Tone<br>und Sande                             |                            | marine Sande<br>und Tone                               |                               | marine und<br>ästuarine<br>Kiese und<br>Sande                                                         |               | Terra rossa<br>marine Sande                                         |
