# Supplementary material
Source: Copernicus journal article supplement (doi:10.5194/egqsj-14-35-1963)

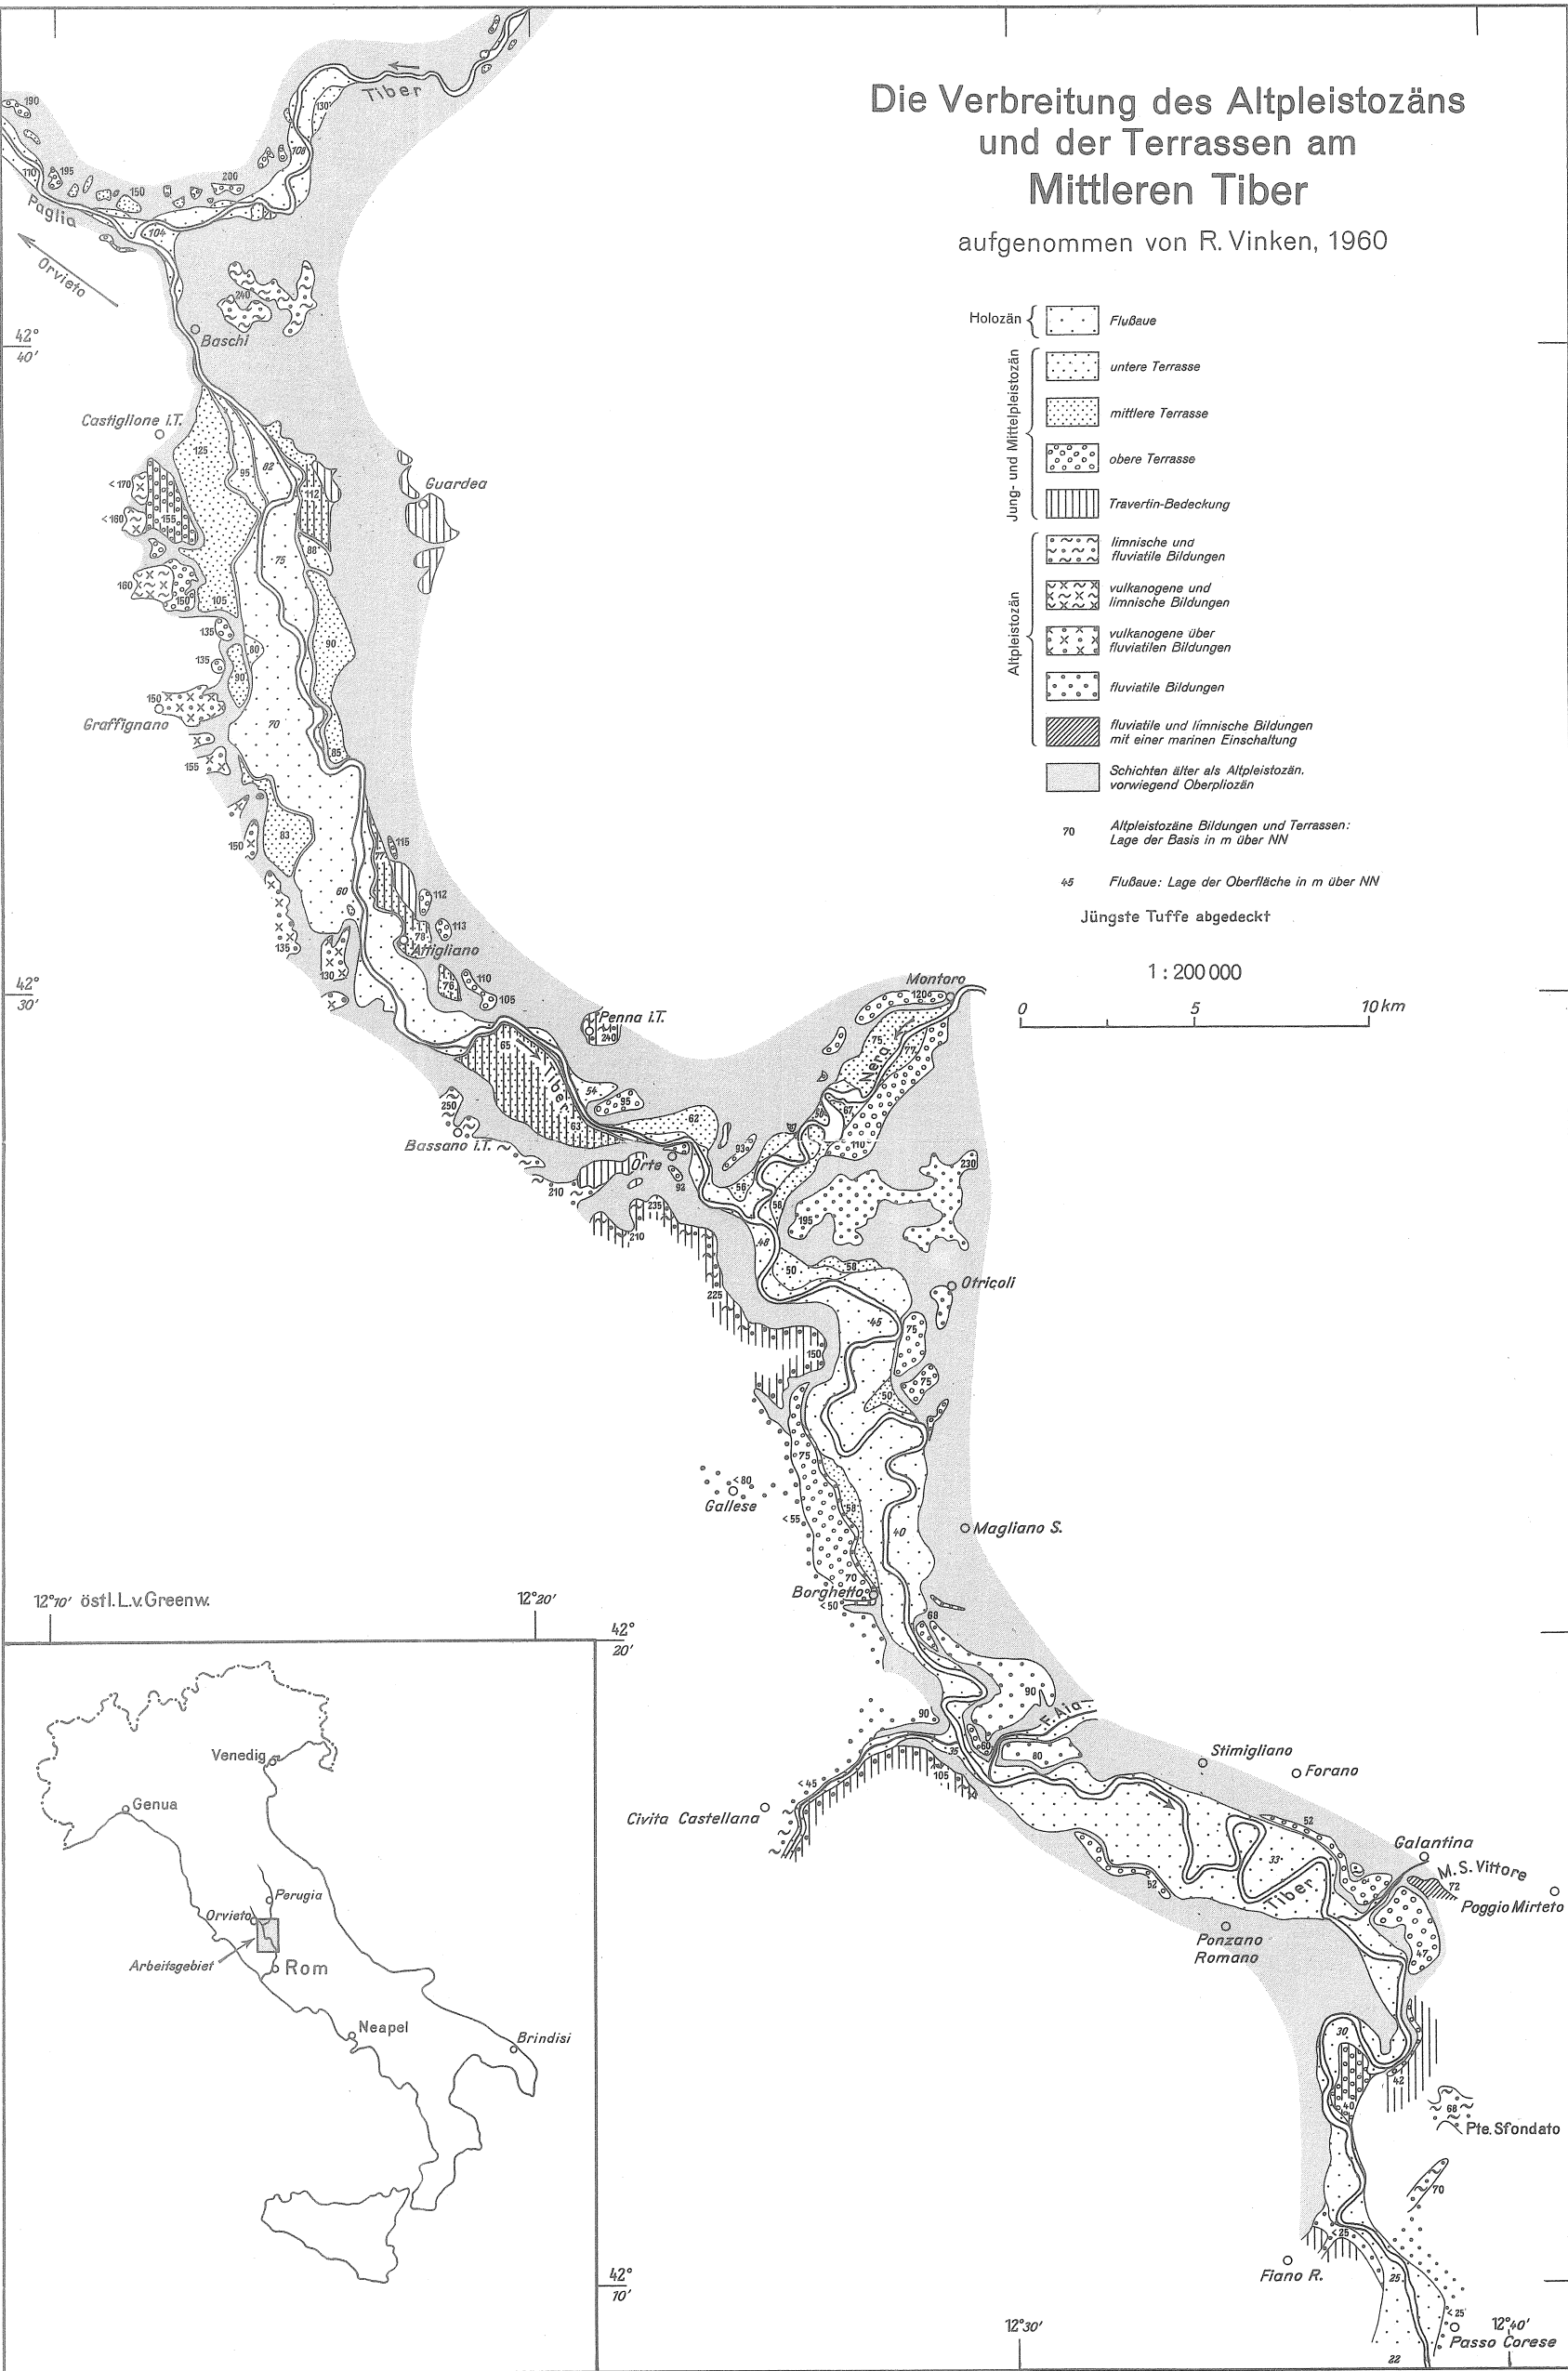

Supplement: Supplementary file 2 [file egqsj-14-35-1963-supplement.zip]
